# Supplementary material for: Effect of welding fumes on the cardiovascular system: a six-year longitudinal study
Source: PubMed Central journal article supplement (PMC7801138; doi:10.5271/sjweh.3908), 2020-12-16
Supplement: SJWEH-47-52-S001.pdf [file SJWEH-47-52-S001.pdf]

## Effect of welding fumes on the cardiovascular system: a six-year longitudinal study<sup>1</sup>

by Tahir Taj, PhD, Anda R Gliga, PhD, Maria Hedmer, PhD, Karin Wahlberg, PhD, Eva Assarsson, RN, Thomas Lundh, PhD, Håkan Tinnerberg, PhD, Maria Albin, PhD, Karin Broberg, PhD<sup>2</sup>

1. *Supplementary material*
2. *Correspondence to: Karin Broberg, Institute of Environmental Medicine, Karolinska Institutet, Stockholm, Sweden. [E-mail: karin.broberg@ki.se]*

Supplementary Table S1. Self-reported cardiovascular disease (CVD), medication for CVD, and family history of CVD in welders (n=78) and controls (n=96) measured 6 years apart.

|                                    | Timepoint 1<br>2010-2011 |          | Timepoint 2<br>2016-2017 |          |
|------------------------------------|--------------------------|----------|--------------------------|----------|
|                                    | Welders                  | Controls | Welders                  | Controls |
| <i>Self-Reported CVD n (%)</i>     |                          |          |                          |          |
| Myocardial infarction              | 0 (0)                    | 0 (0)    | 0 (0)                    | 0 (0)    |
| Angina pectoris                    | 7 (9)                    | 7 (7)    | 10 (13)                  | 5 (5)    |
| Hypertension                       | 20 (26)                  | 14 (15)  | 32 (41)                  | 25 (26)  |
| Stroke                             | 0 (0)                    | 0 (0)    | 2 (3)                    | 0 (0)    |
| Blood clot                         | 0 (0)                    | 2 (2)    | 2 (3)                    | 4 (4)    |
| Other heart diseases               | 0 (0)                    | 2 (2)    | 2 (3)                    | 6 (6)    |
| <i>Medication for CVD n (%)</i>    |                          |          |                          |          |
| Beta blocker                       | 2 (3)                    | 2 (2)    | 7 (9)                    | 1 (1)    |
| ACE inhibitor                      | 7 (9)                    | 2 (2)    | 9 (12)                   | 6 (6)    |
| Calcium channel blocker            | 0 (0)                    | 0 (0)    | 1 (1)                    | 1 (1)    |
| Statin                             | 2 (3)                    | 0 (0)    | 5 (6)                    | 8 (8)    |
| Serotonin receptor inhibitor       | 1(1)                     | 0 (0)    | 0 (0)                    | 0 (0)    |
| <i>Family history of CVD n (%)</i> |                          |          |                          |          |
| Myocardial infarction              | 17 (22)                  | 19 (20)  | 23 (29)                  | 23 (24)  |
| Stroke                             | 13 (17)                  | 12 (13)  | 14 (18)                  | 13 (14)  |
| Hypertension                       | 51 (65)                  | 59 (61)  | 56 (72)                  | 72 (75)  |
